# Supplementary material for: Malaria Elimination Campaigns in the Lake Kariba Region of Zambia: A Spatial Dynamical Model
Source: PubMed Central journal article supplement (PMC5120780; doi:10.1371/journal.pcbi.1005192), 2016-11-23
Supplement: pcbi.1005192.s007.pdf [file pcbi.1005192.s007.pdf]

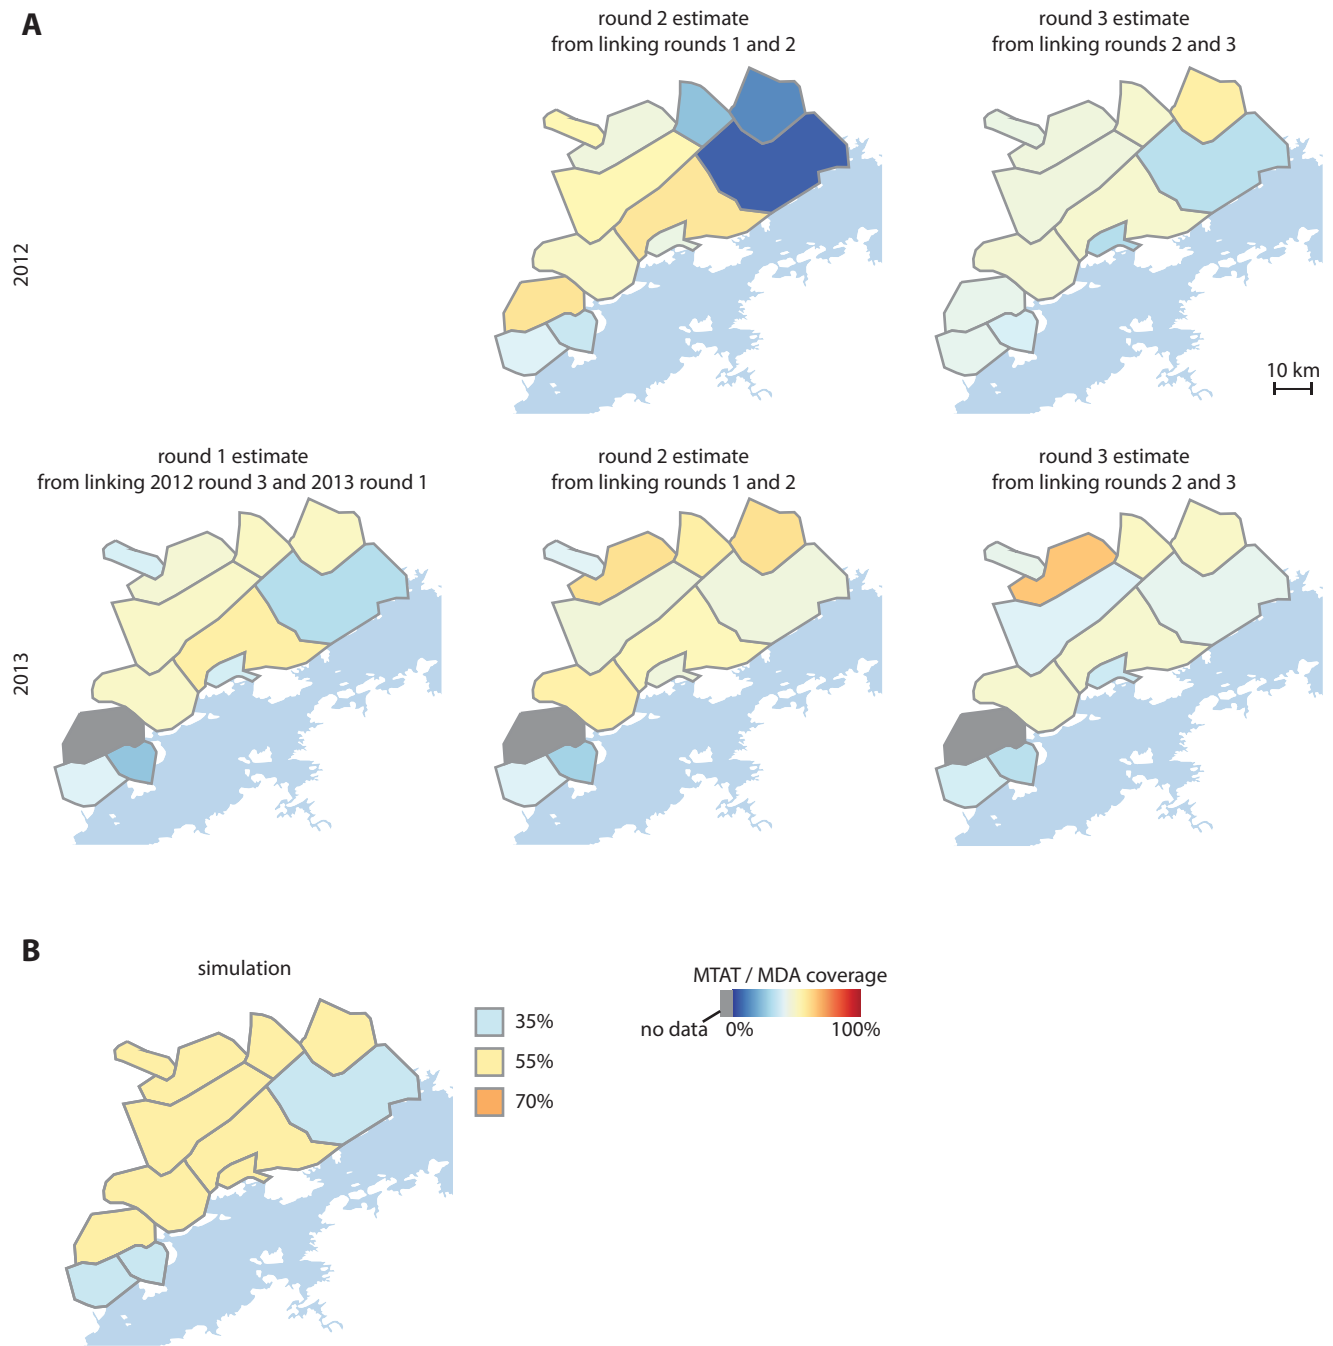

Figure S5. MTAT coverage by HFCA. (A) Coverage estimated from linked individuals in surveillance data. (B) MTAT and MDA coverage used in simulation.
