# Supplementary material for: Malaria Elimination Campaigns in the Lake Kariba Region of Zambia: A Spatial Dynamical Model
Source: PubMed Central journal article supplement (PMC5120780; doi:10.1371/journal.pcbi.1005192), 2016-11-23
Supplement: pcbi.1005192.s010.pdf [file pcbi.1005192.s010.pdf]

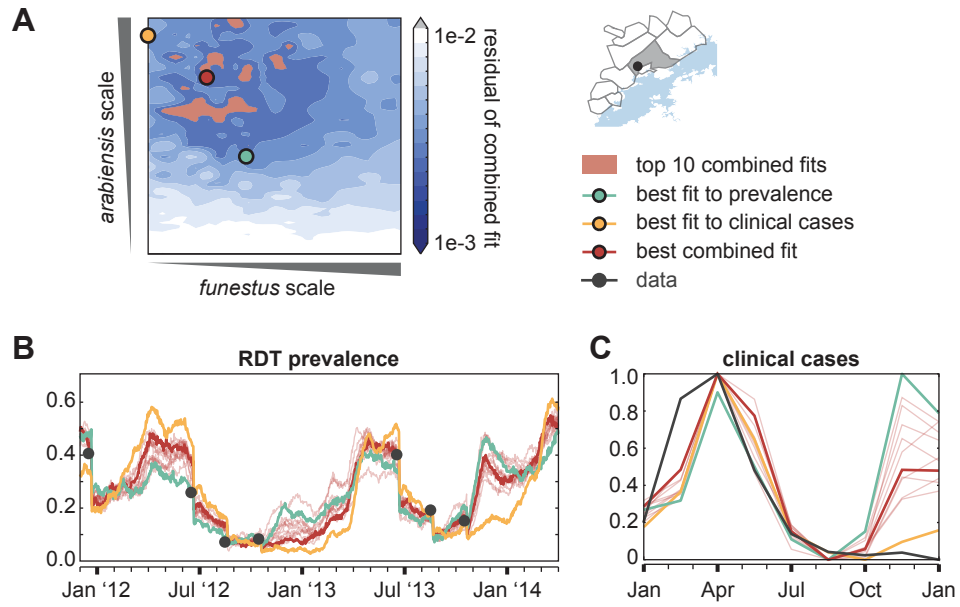

Figure S8. Example calibration of a cluster where best fits to prevalence and clinical cases show somewhat different patterns of seasonality. See caption for Fig 3 for details.
